# Supplementary material
Source: publisher site journal article supplement (https://www.dovepress.com/get_supplementary_file.php?f=439682.docx)
Supplement: Supplementary file 1 [file get_supplementary_file.php]

| **Supplemental Table 1: aOR of Engagement in IHM Modalities for Pain** | | | | |
| --- | --- | --- | --- | --- |
| **Group** | **Comparison** | **aOR** | **95% CI Low** | **95% CI High** |
| (Intercept) | (Intercept) | 0.187 | 0.116 | 0.299 |
| Age | **Age +10yrs** | 0.858 | 0.820 | 0.899 |
| Sex | **Male v. Female** | 0.804 | 0.692 | 0.934 |
| Race/Ethnicity | Hispanic v. NH White | 0.938 | 0.728 | 1.209 |
| **NH Black v. NH White** | 0.683 | 0.531 | 0.879 |
| **Other v. NH White** | 0.702 | 0.503 | 0.980 |
| Education | **HS/GED v. < HS** | 1.516 | 1.163 | 1.975 |
| **Some College v. < HS** | 2.193 | 1.661 | 2.896 |
| **Assoc/Bach v. < HS** | 2.868 | 2.197 | 3.744 |
| **Masters/PhD v. < HS** | 4.043 | 2.815 | 5.806 |
| Family income | **Fam income +$10,000** | 1.037 | 1.021 | 1.053 |
| Proximity to metro area | M/S metro v. Non-metro | 1.067 | 0.859 | 1.324 |
| **L fringe metro v. Non-metro** | 1.301 | 1.027 | 1.648 |
| **L central metro v. Non-metro** | 1.590 | 1.261 | 2.004 |
| Number of pain locations | **Pain locations +1** | 1.198 | 1.130 | 1.271 |
| Pain limiting life or work | **Pain limit some days v. Never** | 1.388 | 1.147 | 1.680 |
| **Pain limit most days v. Never** | 1.508 | 1.186 | 1.916 |
| **Pain limit every day v. Never** | 1.604 | 1.268 | 2.029 |
| Opioid use past 3 mo | Opioids some days v. Never | 1.150 | 0.827 | 1.599 |
| Opioids most days v. Never | 1.175 | 0.692 | 1.996 |
| **Opioids every day v. Never** | 0.708 | 0.533 | 0.942 |
| PHQ-8 | PHQ-8 +5 units | 1.074 | 0.998 | 1.156 |
| Bold covariates contain 95% confidence intervals that do not cross 1 (null). Abbreviations: Assoc, associate’s; aOR, adjusted odds ratio; Bach, bachelor’s; CI, confidence interval; fam, family; GED, general equivalency diploma; HS, high school; L, large; M, medium; metro, metropolitan; NH, mo, months; Non-Hispanic; PHQ-8, Patient Health Questionnaire-8; S, small; v., versus; yrs, years | | | | |

| **Supplemental Table 2: Relative Change in Count of IHM Modalities Used for Pain** | | | | |
| --- | --- | --- | --- | --- |
| **Group** | **Comparison** | **Relative change** | **95% CI Low** | **95% CI High** |
| (Intercept) | (Intercept) | 0.749 | 0.427 | 1.315 |
| Age | **Age +10yrs** | 0.866 | 0.825 | 0.910 |
| Sex | **Male v. Female** | 0.775 | 0.663 | 0.907 |
| Race/Ethnicity | Hispanic v. NH White | 0.829 | 0.634 | 1.084 |
| NH Black v. NH White | 0.908 | 0.692 | 1.193 |
| Other v. NH White | 0.736 | 0.513 | 1.057 |
| Education | HS/GED v. < HS | 1.270 | 0.844 | 1.913 |
| **Some College v. < HS** | 1.894 | 1.275 | 2.814 |
| **Assoc/Bach v. < HS** | 1.772 | 1.199 | 2.619 |
| **Masters/PhD v. < HS** | 1.913 | 1.236 | 2.959 |
| Family income | Fam income +$10,000 | 1.010 | 0.997 | 1.024 |
| Proximity to metro area | M/S metro v. Non-metro | 1.069 | 0.838 | 1.364 |
| L fringe metro v. Non-metro | 1.058 | 0.817 | 1.371 |
| L central metro v. Non-metro | 1.241 | 0.971 | 1.587 |
| Number of pain locations | **Pain locations +1** | 1.102 | 1.041 | 1.167 |
| Pain limiting life or work | Pain limit some days v. Never | 1.209 | 0.991 | 1.476 |
| **Pain limit most days v. Never** | 1.315 | 1.034 | 1.672 |
| Pain limit every day v. Never | 1.180 | 0.916 | 1.520 |
| Opioid use past 3 mo | Opioids some days v. Never | 0.888 | 0.623 | 1.265 |
| Opioids most days v. Never | 1.265 | 0.746 | 2.147 |
| Opioids every day v. Never | 0.767 | 0.529 | 1.111 |
| PHQ-8 | **PHQ-8 +5 units** | 0.901 | 0.834 | 0.973 |
| Bold covariates contain 95% confidence intervals that do not cross 1 (null). Abbreviations: Assoc, associate’s; aOR, adjusted odds ratio; Bach, bachelor’s; CI, confidence interval; fam, family; GED, general equivalency diploma; HS, high school; L, large; M, medium; metro, metropolitan; mo, months; PHQ-8, Patient Health Questionnaire-8; NH, Non-Hispanic; S, small; v., versus; yrs, years | | | | |

**Supplemental Figure 1: Observed vs. Predicted Values in the Weighted Hurdle Poisson Model**


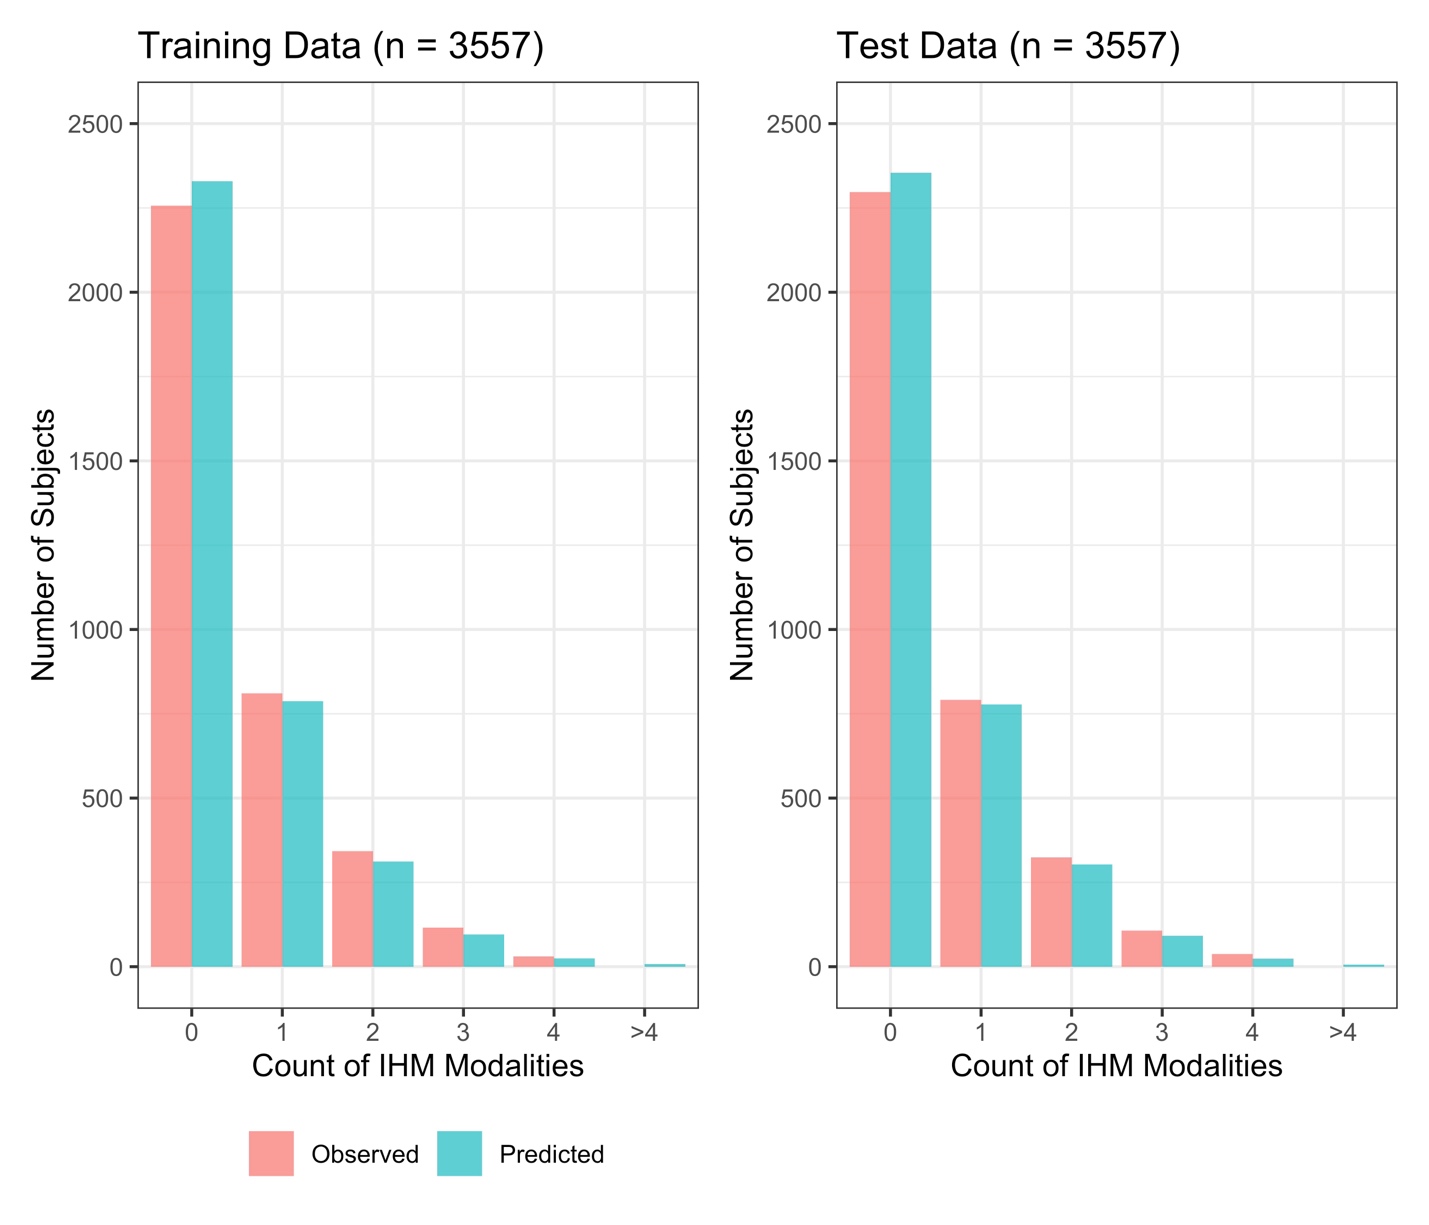


| **Supplemental Table 3: aOR of Engagement in Nonpharmacologic Only vs. Opioids Only** | | | | |
| --- | --- | --- | --- | --- |
| **Group** | **Comparison** | **aOR** | **95% CI Low** | **95% CI High** |
| Age | **Age 69 v. 46** | 0.614 | 0.530 | 0.711 |
| Sex | Male v. Female | 0.831 | 0.678 | 1.018 |
| Race/Ethnicity | Hispanic v. NH White | 1.337 | 0.942 | 1.897 |
| NH Black v. NH White | 0.868 | 0.630 | 1.196 |
| Other v. NH White | 1.594 | 0.974 | 2.607 |
| Education | **HS/GED v. < HS** | 1.639 | 1.232 | 2.179 |
| **Some College v. < HS** | 2.094 | 1.522 | 2.881 |
| **Assoc/Bach v. < HS** | 3.176 | 2.301 | 4.383 |
| **Masters/PhD v. < HS** | 3.943 | 2.325 | 6.687 |
| Family income | **Family income $85k v. $22k** | 1.596 | 1.352 | 1.883 |
| Proximity to metro area | **M/S metro v. Non-metro** | 1.327 | 1.016 | 1.734 |
| **L fringe metro v. Non-metro** | 1.864 | 1.356 | 2.562 |
| **L central metro v. Non-metro** | 1.449 | 1.075 | 1.954 |
| Number of pain locations | 4 pain locations v. 2 | 1.001 | 0.852 | 1.176 |
| Pain limiting life or work | **Pain limit some days v. Never** | 0.541 | 0.390 | 0.750 |
| **Pain limit most days v. Never** | 0.493 | 0.341 | 0.713 |
| **Pain limit every day v. Never** | 0.363 | 0.256 | 0.513 |
| PHQ-8 | PHQ-8 score 8 v. 1 | 0.952 | 0.834 | 1.088 |
| Bold covariates contain 95% confidence intervals that do not cross 1 (null). Abbreviations: Assoc, associate’s; aOR, adjusted odds ratio; Bach, bachelor’s; CI, confidence interval; fam, family; GED, general equivalency diploma; HS, high school; L, large; M, medium; metro, metropolitan; NH, Non-Hispanic; PHQ-8, Patient Health Questionnaire-8; S, small; v., versus; yrs, years | | | | |
